# Supplementary material
Source: PubMed Central journal article supplement (PMC3774010)
Supplement: NIHMS501035-supplement-1.pdf [file NIHMS501035-supplement-1.pdf]

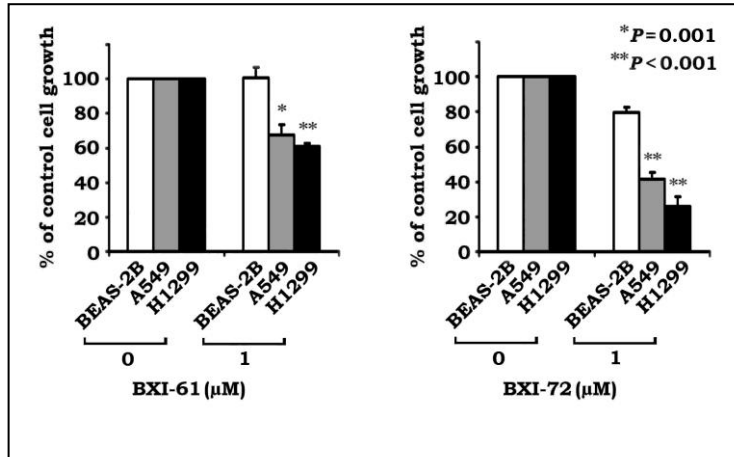

**Figure S1.** BXIs represent relatively selective cytotoxicity against lung cancer cells (A549 and H1299) compared to normal human bronchial epithelial cells (BEAS-2B). BEAS-2B, A549 and H1299 cells were treated with the 1 μM of BXI-61 or BXI-72 for 72 hours. Cell growth was analyzed by SRB assay. Error bars represent  $\pm$  S.D.
