# Supplementary material
Source: PubMed Central journal article supplement (PMC3774010)
Supplement: NIHMS501035-supplement-2.pdf [file NIHMS501035-supplement-2.pdf]

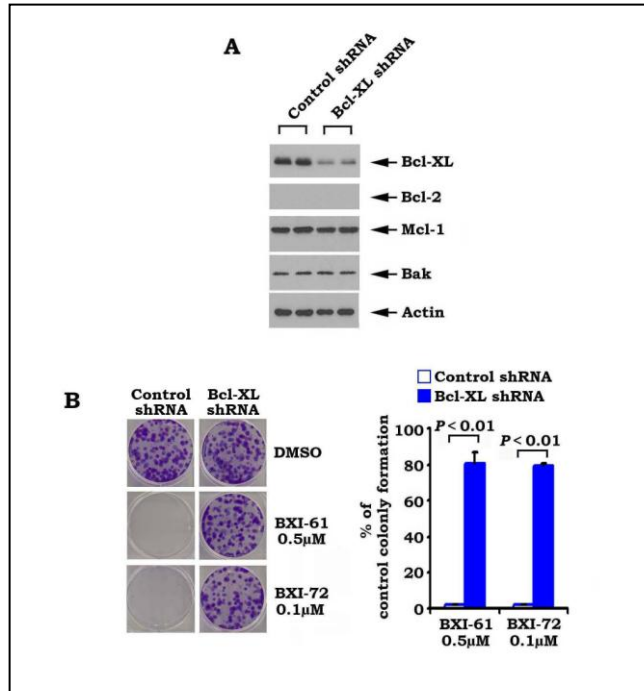

**Figure S2.** Depletion of Bcl-XL by RNAi reduces sensitivity of lung cancer cells to BXIs. *A*, Bcl-XL shRNA or control shRNA was transfected into H1299 cells. Expression levels of Bcl-XL, Bcl2 and Mcl-1 were analyzed by Western blot. *B*, H1299 cells expressing Bcl-XL shRNA or control shRNA were treated with BXI-61 or BXI-72 as indicated concentration for 10 days. Cell growth was analyzed by colony formation assay. Data are mean  $\pm$  SD from three independent experiments.
