# Supplementary material
Source: PubMed Central journal article supplement (PMC3774010)
Supplement: NIHMS501035-supplement-3.pdf [file NIHMS501035-supplement-3.pdf]

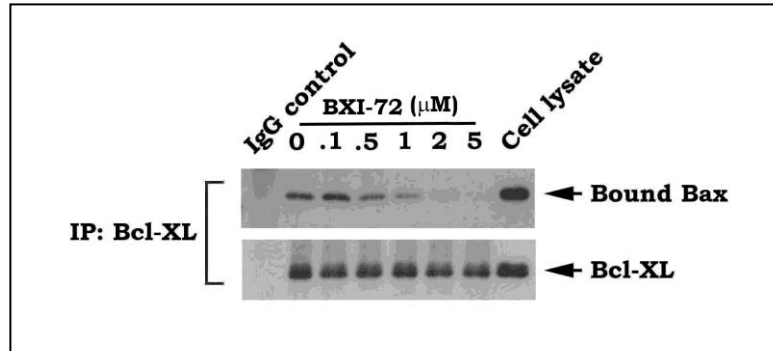

**Figure S3.** Treatment of human lung cancer cells with BXI-72 results in Bcl-XL/Bax dissociation. A, H1299 cells were treated with increasing concentrations of BXI-72 for 24h. A co-immunoprecipitation (IP) was performed using a Bcl-XL antibody. Bcl-XL-associated Bax and Bcl-XL were analyzed by Western blot. Normal IgG was used as control for IP.
