# Supplementary material
Source: PubMed Central journal article supplement (PMC3774010)
Supplement: NIHMS501035-supplement-4.pdf [file NIHMS501035-supplement-4.pdf]

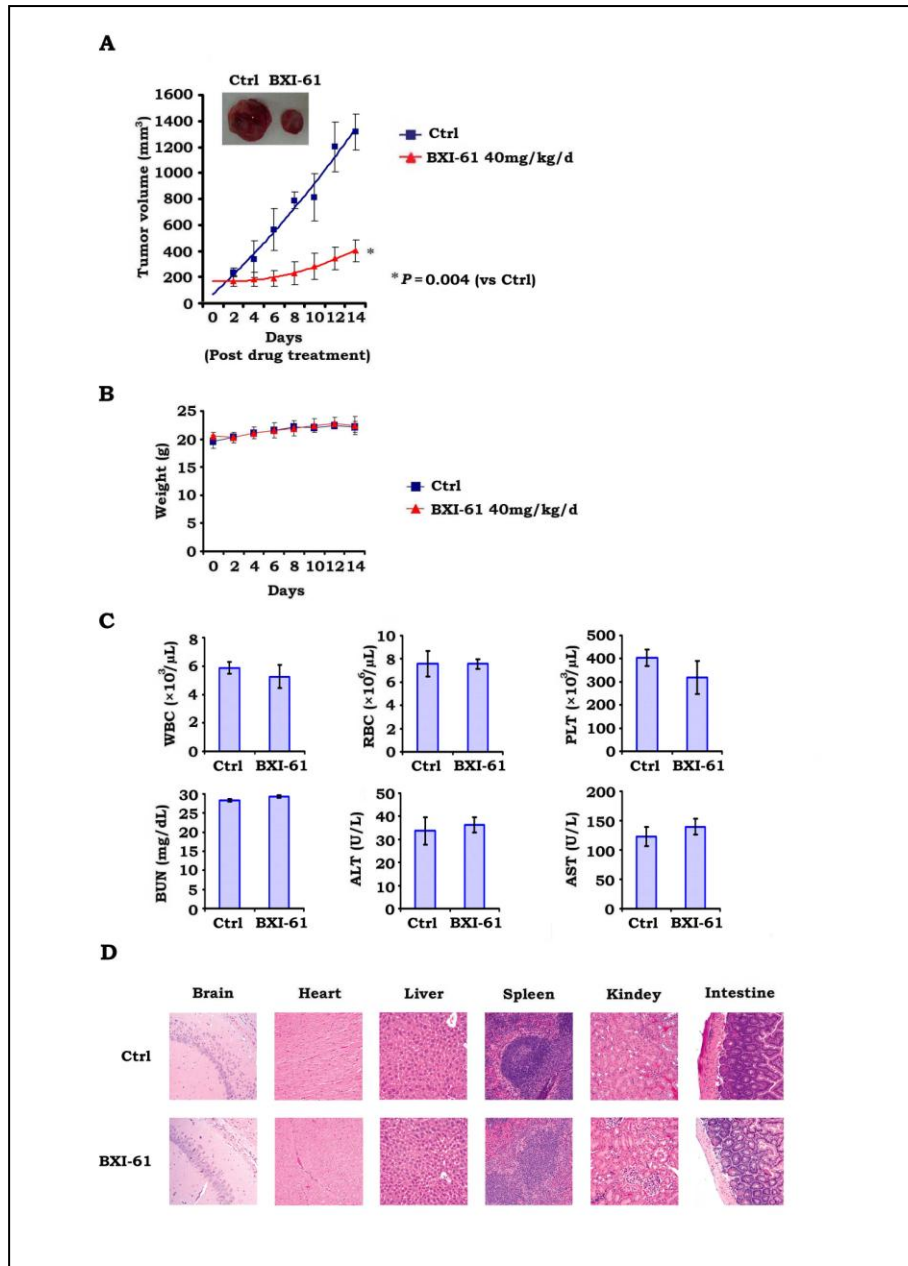

**Figure S4.** BXI-61 potently represses lung cancer growth *in vivo*. *A*, Nu/Nu mice with H1299 lung cancer xenografts were treated with BXI-61 (40mg/kg/d) by i.p. for 14 days. Each group includes 8 mice. Tumor volume was measured once every 2 days. After 14 days, the mice were sacrificed. Tumors were then removed with picture taken. *B*, Body weight of mice was measured once every other day during treatment with BXI-61 (40mg/kg/d). *C*, Blood analysis from mice. *D*, H&E histology of various organs from mice after treatment with BXI-61.
