# Supplementary material
Source: PubMed Central journal article supplement (PMC3774010)
Supplement: NIHMS501035-supplement-5.pdf [file NIHMS501035-supplement-5.pdf]

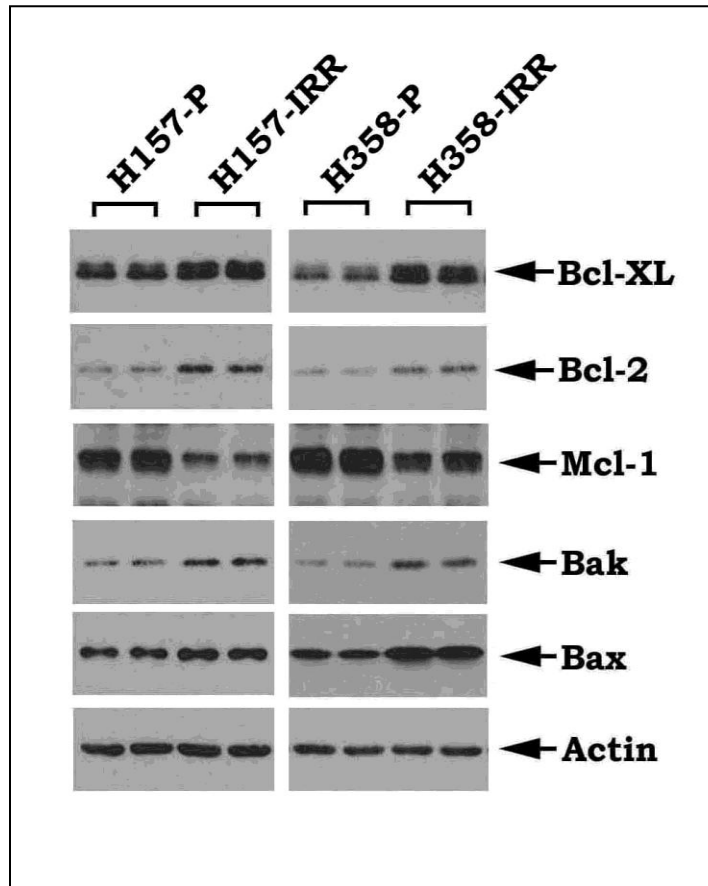

**Figure S5.** Irradiation resistance (IRR) is associated with elevated levels of Bcl-XL and Bcl-2 in human lung cancer cells. Levels of Bcl-XL, Mcl-1, Bcl-2, Bak, or Bax were analyzed by Western blot in lung cancer parental cells (H157-P and H358-P) and irradiation resistant cells (H157-IRR and H358-IRR).
