# Supplementary material
Source: PubMed Central journal article supplement (PMC3774010)
Supplement: NIHMS501035-supplement-6.pdf [file NIHMS501035-supplement-6.pdf]

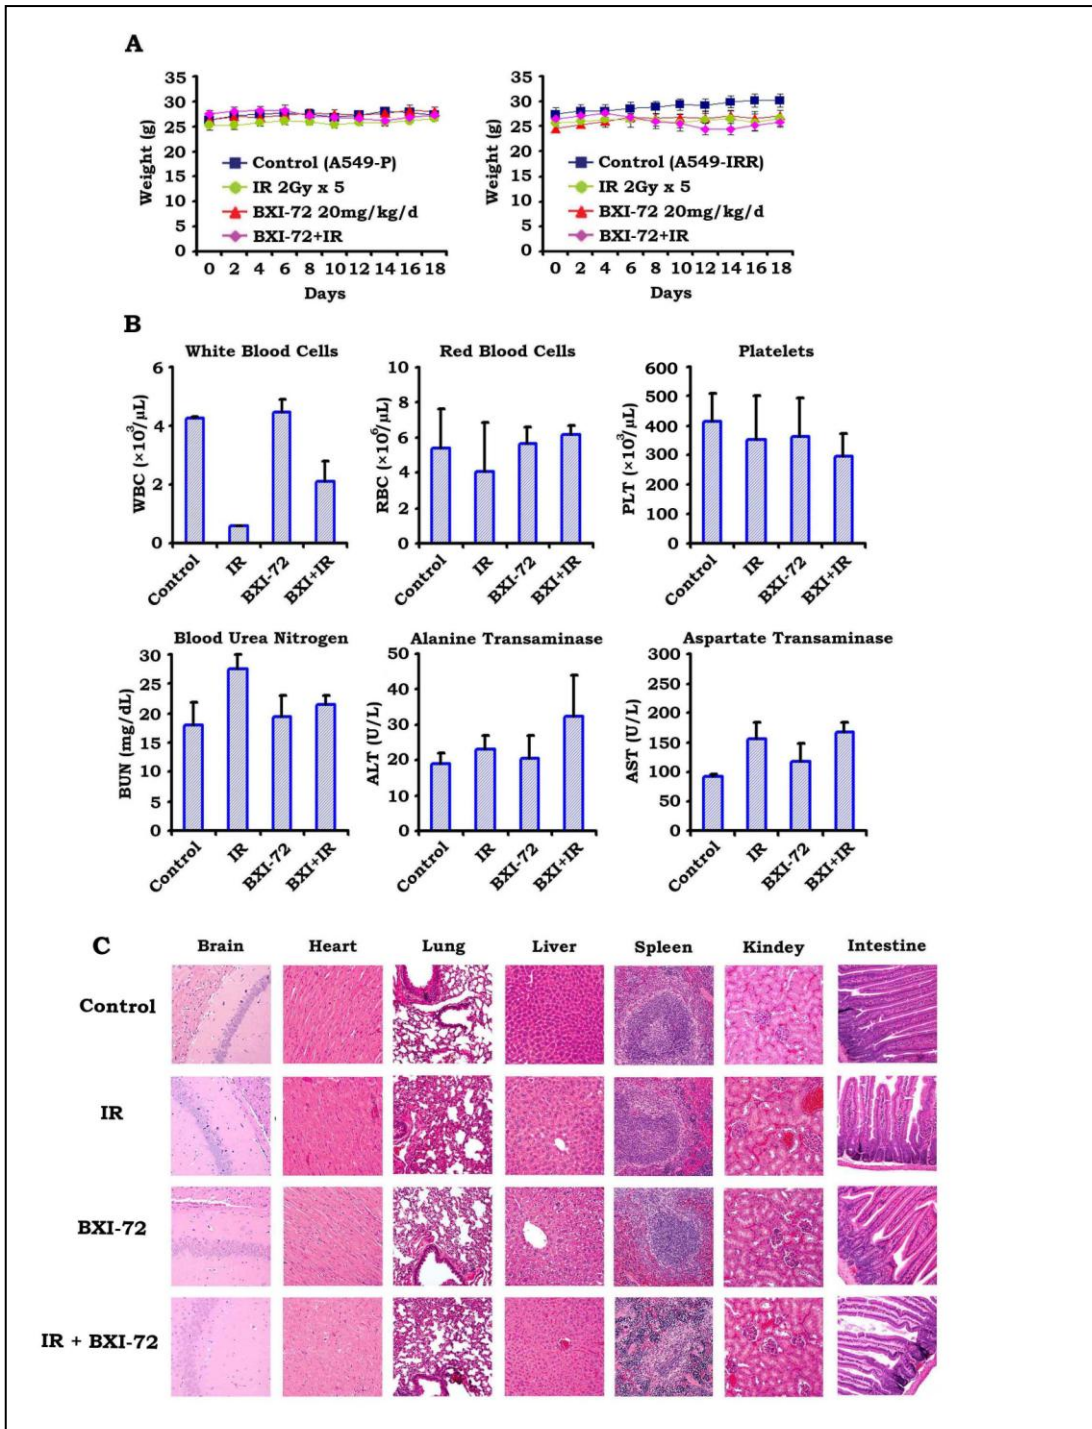

**Figure S6.** Analysis of toxicity for combination of BXI-72 and IR *in vivo*. **A**, Body weight of mice with A549-P or A549-IRR xenografts was measured once every other day during treatment with IR (2Gy  $\times$ 5), BXI-72 (20mg/kg/d) or their combination. **B**, Blood analysis of mice after treatment with IR (2Gy  $\times$ 5), BXI-72 (20mg/kg/d) or their combination. **C**, H&E histology of various organs after treatment with IR (2Gy  $\times$ 5), BXI-72 (20mg/kg/d) or their combination.
